# 1 Impact of rare and common genetic variation in the Interleukin- 2 1 pathway on human cytokine responses

3

4 Rosanne C. van Deuren<sup>1,2,3</sup>, Peer Arts<sup>2,4</sup>, Giulio Cavalli<sup>1,5,6</sup>, Martin Jaeger<sup>1,3</sup>, Marloes Steehouwer<sup>2</sup>, Maartje van  
5 de Vorst<sup>2</sup>, Christian Gilissen<sup>2,3</sup>, Leo A.B. Joosten<sup>1,3,7</sup>, Charles A. Dinarello<sup>1,6</sup>, Musa M. Mhlanga<sup>8,9</sup>, Vinod  
6 Kumar<sup>1,10</sup>, Mihai G. Netea<sup>1,3,11</sup>, Frank L. van de Veerdonk<sup>1,3</sup>, Alexander Hoischen<sup>1,2,3</sup>

7

8 1. Department of Internal Medicine, Radboud University Medical Center, Nijmegen, the Netherlands

9 2. Department of Human Genetics, Radboud University Medical Center, Nijmegen, the Netherlands

10 3. Radboud Institute of Molecular Life Sciences (RIMLS), Radboud University Medical Center, Nijmegen, the  
11 Netherlands

12 4. Department of Genetics and Molecular Pathology, Centre for Cancer Biology, SA Pathology and the University  
13 of South Australia, Adelaide, South Australia, Australia

14 5. Unit of Immunology, Rheumatology, Allergy and Rare Diseases, IRCCS San Raffaele Hospital and Vita-Salute  
15 San Raffaele University, Milan, Italy

16 6. Department of Medicine, University of Colorado, Aurora, Colorado, USA

17 7. Department of Medical Genetics, Iuliu Hatieganu University of Medicine and Pharmacy, Cluj-Napoca, Romania

18 8. Division of Chemical Systems & Synthetic Biology, Institute for Infectious Disease & Molecular Medicine (IDM),  
19 Department of Integrative Biological & Medical Sciences, University of Cape Town, Cape Town, South Africa

20 9. Faculty of Health Sciences, Department of Integrative Biomedical Sciences, University of Cape Town, Cape  
21 Town, South Africa

22 10. University of Groningen, University Medical Center Groningen, Department of Genetics, Groningen, The  
23 Netherlands

24 11. Department for Genomics & Immunoregulation, Life and Medical Sciences Institute (LIMES), University of  
25 Bonn, Bonn, Germany

26

27 Corresponding author: Dr. Alexander Hoischen; [Alexander.Hoischen@radboudumc.nl](mailto:Alexander.Hoischen@radboudumc.nl)

28

29

30

31

32

33 **ABSTRACT**

34

35 **Background:** Interleukin(IL)-1 signaling is of major importance in human innate cytokine  
36 responses. Common variants in related genes have been linked to various inflammation-  
37 mediated diseases and stimulation-induced cytokine responses, but the role of rare variants  
38 remains to be elucidated.

39 **Methods:** In this study, we characterize the role of rare and common genetic variation, as  
40 identified by molecular inversion probe-based sequencing, in 48 genes related to the IL-1  
41 pathway. Using a systems biology approach, we examined the inter-individual variability of *in*  
42 *vitro* stimulation-specific human cytokine responses from 463 healthy individuals of the  
43 Human Functional Genomics Project and assessed the role of rare and common genetic  
44 variants, separately and combined, by means of the Sequence Kernel Association Test.

45 **Results:** We identified strong associations for rare genetic variants in *NCF4* ( $_{\text{adj}}P=7.2E^{-05}$ )  
46 and *CASP1* ( $_{\text{adj}}P=3.0E^{-05}$ ) with IL-6 production in response to PHA and LPS stimulation,  
47 respectively. In addition, common variants in *IL36A* and *IL38* were associated to both *C.*  
48 *albicans*-induced IL-1 $\beta$  (*IL36A*  $_{\text{adj}}P=0.0442$ ; *IL38*  $_{\text{adj}}P=0.0092$ ) and IL-6 production (*IL36A*  
49  $_{\text{adj}}P=0.0037$ ; *IL38*  $_{\text{adj}}P=0.0082$ ), an effect that was stronger at the subpathway level both for  
50 IL-1 $\beta$  ( $_{\text{adj}}P=0.0017$ ) and IL-6 ( $_{\text{adj}}P=1.8E^{-04}$ ). The common variant signature for the IL-1 $\beta$  and  
51 IL-6 response to *C. albicans* was confirmed by an association with all anti-inflammatory  
52 genes ( $_{\text{adj}}P=1.87E^{-03}$  and  $_{\text{adj}}P=5.75E^{-04}$ ), and we validated this finding for non-coding  
53 common variants. Lastly, we identified a burden of rare variants in pro-inflammatory genes  
54 and LPS-induced IL-6 production ( $_{\text{adj}}P=2.42E^{-04}$ ), and a new role for anti-inflammatory rare  
55 variants on *S. aureus*-stimulated IL-6 production ( $_{\text{adj}}P=6.71E^{-03}$ ).

56 **Conclusions:** In conclusion, we show that both common and rare genetic variation in genes  
57 of the IL-1 pathway, separately and combined, differentially influence *in vitro* cytokine  
58 responses to various stimuli in healthy individuals. This study therefore accentuates potential  
59 mechanisms that are translatable into new hypothesis-driven characterization of common

60 and rare variant involvement in a wide variety of inflammatory and immunological  
61 mechanisms and diseases.

62

63 **Keywords:** rare variants, SKAT, common variants, region-based analysis, Interleukin-1  
64 pathway, immunological mechanisms, systems biology

65

66

67

68

69

70

71

72

73

74

75

76

77

78

79

80

81

82

83

84

85

86

87

## 88 BACKGROUND

89

90 The innate immune system is our first line of defense against invading pathogens such as  
91 viruses, bacteria, fungi and parasites. It consists of a variety of cell populations (*e.g.* myeloid  
92 cells, natural killer cells, innate lymphocytes) and soluble mediators (*e.g.* complement), each  
93 fulfilling a well-defined function. Collectively, these components shape innate immune  
94 responses. The induction of inflammation in response to *e.g.* infection is a naturally  
95 occurring and necessary process. Notwithstanding, both stimulatory and inhibitory  
96 mechanisms are required to induce effective elimination of pathogens, as well as to limit  
97 collateral damage to the tissues, *i.e.* prevent auto-inflammation(1).

98 The Interleukin-1 (IL-1) family of cytokines and receptors plays a major role in the  
99 induction and regulation of host defense and inflammation(2). The IL-1 family comprises pro-  
100 inflammatory cytokines (*e.g.* IL-1 $\alpha$ / $\beta$ , IL-36 $\alpha$ / $\beta$ / $\gamma$ ), anti-inflammatory cytokines (*e.g.* IL-37, IL-  
101 38), activating receptors (*e.g.* IL1-R1, IL-36R), decoy receptors (*e.g.* IL-1R2, IL-18BP), and  
102 additional regulators, kinases and phosphatases that altogether are responsible for the IL-1-  
103 mediated response(3). Next to core IL-1 family effectors, members of the inflammasome and  
104 autophagy pathway are important contributors to the regulation of IL-1-induced inflammation.  
105 For instance, activation of the inflammasome allows for cleavage and activation of caspase-  
106 1, with subsequent activation and release of pro-inflammatory cytokines IL-1 $\beta$  and IL-18.  
107 Conversely, autophagy is an important process involved in cell homeostasis, but is also able  
108 to directly inhibit the inflammatory response by removing inflammasome components and  
109 damaged mitochondria(4).

110

111 Defects in IL-1 pathway signaling and its specific members have been linked to  
112 various inflammation-mediated diseases(2, 5). Pro-inflammatory members of the IL-1 family,  
113 *e.g.* IL-1 $\beta$  and IL-18, play an important role in a variety of (auto-)inflammatory or immune  
114 diseases. For instance, a loss of balance in processing and secretion of IL-1 $\beta$  is an  
115 important feature of chronic inflammatory conditions like gout, systemic-onset juvenile



116 idiopathic arthritis (sJIA), adult-onset Still's disease (AoSD) and osteoarthritis(5). Moreover,  
117 IL-18 plasma concentrations are moderately elevated in systemic lupus erythematoses  
118 (SLE) and in rheumatoid arthritis (RA), while being severely increased in patients with  
119 macrophage activation syndrome (MAS)(5). Circulating concentrations of anti-inflammatory  
120 members of the IL-1 family are characteristically increased in numerous inflammatory  
121 conditions. Specifically, plasma concentrations of IL-1Ra, the anti-inflammatory competitor of  
122 IL-1 $\alpha$  and IL-1 $\beta$  encoded by the *IL1RN* gene, are systemically increased in *i.e.* sepsis,  
123 Crohn's disease and ulcerative colitis, and locally increased in the joints from patients with  
124 RA and osteoarthritis(6). The IL-1 type 2 receptor, a decoy receptor that binds IL-1 but does  
125 not induce an intracellular pro-inflammatory signal, has also been found increased in sepsis  
126 and has potential as a candidate biomarker in patients with acute respiratory distress  
127 syndrome(6).

128 For a number of (auto-)inflammatory diseases, the clinical presentation clearly points  
129 towards dysregulated activity of the IL-1 pathway. A targeted search based on clinical  
130 presentation for genetic defects in genes related to the IL-1 pathway, has therefore been  
131 proven most useful in patients with CAPS (cryopyrin associated periodic syndromes) and  
132 DIRA (deficiency of IL-1 receptor antagonist) with the identification of mutations in *NLRP3*  
133 and *IL1RN* respectively(5, 7). On the other hand, even though Adult-onset Still's Disease  
134 (AoSD), Behcet's and Schnitzler disease share clinical similarities with CAPS, for those no  
135 single causal genetic defect has been identified to date, despite the fact that subsets of  
136 patients have presented with mutations in related genes indicating that the likely genetic  
137 basis is close(7). In addition to rare variants, a number of Genome Wide Association Studies  
138 (GWAS) have identified common variants in the IL-1 pathway to be associated with  
139 inflammatory diseases and stimulation-induced cytokine responses(8-11). However, most  
140 studies so far have investigated rare and common variants separately. Considering  
141 increasing evidence that variability in phenotypic presentation can be caused by an interplay  
142 between variants of variable frequencies(12-14), or aggregation of genetic variants over  
143 genes underlying dysregulated biological mechanisms(15), or even over genes that are

144 more distantly involved(16), we hypothesize that studies on the genetic basis of  
145 inflammatory diseases might also benefit from this concept.

146

147 Immune responses are highly variable between individuals, and the broad spectrum  
148 of this inter-individual variability ranges from healthy, e.g. protection against infection or  
149 trauma by inflammatory responses, to diseased individuals, e.g. sepsis or auto-inflammatory  
150 syndromes caused by excessive inflammation. For this reason, in the past few decades  
151 various studies have focused on determining the genetic variation that contributes to the  
152 inter-individual variability in immune responses(17-22). In brief, these studies assess the  
153 separate and shared contribution of host and environmental factors to an immunological  
154 response after a specific stimulus, yet all conclude that a considerable percentage of  
155 immune response variation between individuals remains unexplained. One important  
156 shortcoming is that most studies to date have focused on common genetic variants, while  
157 the impact of rare or private variants remains poorly or not at all understood. With recent  
158 advancements in sequencing technologies, the ability to study the role of rare variants has  
159 remarkably improved, and its value has been proven in several studies. For instance,  
160 increasing evidence is showing that the combined effect of common and rare variants could  
161 partially explain the missing heritability problem in complex diseases(12-14, 23, 24). The  
162 relatively small-to-moderate effects of common variants can be significantly modified by the  
163 presence or absence of (multiple) rare variants(25). Molecular Inversion Probe (MIP) based  
164 re-sequencing is a targeted sequencing technology that can identify common, low-  
165 frequency, rare and even private variants within a region of interest, and as such allows to  
166 cost-effectively study intermediate sized gene panels (e.g. 50 genes) in relatively large  
167 cohorts(26-29).

168

169 Considering the importance of the IL-1 pathway for inflammation and innate immune  
170 responses, we aimed to identify and characterize rare and common genetic variants in 48  
171 genes related to the IL-1 pathway mediated immune response, and determine their impact

172 on the inter-individual variability of cytokine responses in healthy individuals. A complete  
173 overview of the study workflow can be found in **Figure 1**.

174

175

## 176 **MATERIAL AND METHODS**

177

### 178 Study Cohort

179

#### 180 *Cohort characteristics*

181 The study was conducted using healthy individuals from the Human Functional  
182 Genomics Project (HFGP; 500FG-cohort)(30). The entire 500FG-cohort consists of 534  
183 healthy individuals from the Netherlands (296 females and 237 males) with an age range 18-  
184 75, from which we were able to obtain DNA from 520 individuals for sequencing. For more  
185 details on cohort characteristics see previous publications on the 500FG-cohort(17, 18, 20).

186

#### 187 *Immunophenotyping*

188 In this study we made use of the publicly available extensive immunophenotyping  
189 data that was generated as part of the Human Functional Genomics Project(31).  
190 Specifically, Interleukin-1 $\beta$  (IL-1 $\beta$ ) and Interleukin-6 (IL-6) production by whole blood  
191 (consisting mainly of polymorphonuclear cells (PMNs)) from 471 individuals, stimulated with  
192 either lipopolysaccharide (LPS, 100ng/mL), phytohaemagglutinin (PHA, 10 $\mu$ g/mL), heat-  
193 killed *Candida albicans* (*C. albicans* 10<sup>6</sup> CFU/mL) or *Staphylococcus aureus* (*S. aureus* 1 x  
194 10<sup>6</sup>/mL). A detailed description of these experiments can be found elsewhere(18). In short,  
195 blood was drawn from participants and 100  $\mu$ L of heparin blood was stimulated with 400  $\mu$ L  
196 of stimulus, subsequently incubated for 48 hours at 37°C and 5% CO<sub>2</sub> and supernatants  
197 were collected and stored in -20°C until used for ELISA.

198

### 199 Sequencing

200

### 201 *MIP-panel design*

202           We sequenced all coding exons of 48 genes of the IL-1 pathway in 520 healthy  
203 individuals by Molecular Inversion Probe (MIP)-based re-sequencing. MIPs are a targeted  
204 re-sequencing technology, that allows for the identification of both common- and rare genetic  
205 variation in regions of interest. A detailed description of MIP-probe design and sequencing  
206 methods can be found elsewhere(26, 29, 32). In short, 1285 MIP-probes were designed to  
207 cover all coding exons of 48 genes related to the IL-1 pathway and sequencing was  
208 performed using the Illumina NextSeq500 system. These 48 IL-1 pathway related genes can  
209 be further functionally subclassified into six subpathways that represent a sub-mechanism or  
210 immunological cascade in the IL-1-mediated inflammatory response: IL-1 subpathway, IL-18  
211 subpathway, IL-30s subpathway, Inflammasome, (reactive oxygen species) ROS-  
212 production, and Autophagy. An additional functional sub classification into two inflammation  
213 phenotype groups, was based on the gene-encoded protein function and its pro- or anti-  
214 inflammatory effect. A full explanation on the sub classifications can be found in **Additional**  
215 **File 1.**

216

### 217 *Data processing*

218           A carefully developed filtering pipeline, based on Sanger Sequencing validations,  
219 was applied to ensure high sensitivity and specificity in our final variant set. First, the reads  
220 were aligned using BWA-MEM(33) and subsequently filtered on Mapping Quality  $\geq 60$ , no  
221 soft-clipping, properly paired and not more than five variations from the reference per read,  
222 with the exception of multi-basepair insertions and deletions. Variants were then called using  
223 the GATK unified genotyper(34), which uses a Bayesian genotype likelihood model to  
224 estimate the most likely genotypes. Rare variants (here defined as absent in dbSnp build  
225 150 common(35), or defines as rare by our custom annotator as explained below), were  
226 further filtered on the QUAL parameter  $\geq 1000$  in the vcf. Additionally, the percentage of  
227 alternative alleles for each variant position using samtools mpileup(36), with maximum read

228 depth 10000, no BAQ and a minimal base quality of 30. Homozygous rare variants required  
229 an alternative allele percentage of  $\geq 90\%$ , heterozygous rare variants required an alternative  
230 allele percentage of  $25\%$  and  $< 90\%$ , and rare variants with an alternative allele percentage  
231 of  $< 25\%$  were considered false positive. Samples with an average coverage depth of all  
232 MIPs  $\geq 100x$  were included for analysis. The final variant set was annotated using our  
233 custom annotator, which makes use of several annotation sources, among others the  
234 Variant Effect Predictor (VEP) from Ensembl(37), Combined Annotation Dependent  
235 Depletion (CADD) score(38), and several population based variant databases (e.g. dbSnp,  
236 ExAc and gnomAD(39)) and an “inHouse” database consisting of  $> 25,000$  clinical exomes  
237 run at the diagnostic division of the Department of Human Genetics of the Radboud  
238 University Medical Center (Radboudumc). We used within cohort allele frequencies (AFs) to  
239 separate rare and common variants, based on a common variant cut-off of  $\geq 5\%$ .

240

## 241 Variant Analysis

242

### 243 *Continuous Trait*

244 A Rare Variant Burden Analysis (RVBA) was performed on the log-transformed  
245 cytokine levels by using the Sequence Kernel Association Test (SKAT)(14, 40) in R version  
246 3.5.2. The SKAT is a kernel-based test method, that aggregates weighted individual variant-  
247 score test statistics whilst allowing variant-variant interactions and is extremely powerful  
248 when a genetic region has both protective and deleterious variants or many non-causal  
249 variants(14, 23, 24, 40, 41). The SKAT was performed over three levels of grouping: I)  
250 **gene-level**; where all variants within coding exons of a gene region were considered  
251 (**Figure 1E.I**), II) **subpathway-level**; where all variants within genes that belong to the  
252 corresponding subpathway were considered (**Figure 1E.II**), and III) **inflammatory-**  
253 **phenotype level**; where based on encoded protein function genes were classified as either  
254 pro-inflammatory or anti-inflammatory and all variants from genes in either groups were  
255 considered (**Figure 1E.III**). Furthermore, for each region the ‘normal’ SKAT was run to

256 determine the effect of only common (I.SKAToC), only rare (III.SKAToR) and common and  
257 rare variants combined (II.SKATjoint), based on a cohort MAF of 5% as cut-off, using the  
258 SKAT\_CommonRare function with default weights. However, since the SKAT can be less  
259 powerful than burden tests when rare variants in a set are truly causal or influencing the  
260 phenotype in the same direction(41), we additionally applied the SKAT-O algorithm to the  
261 rare variants (SKATO), appropriately weighing the variants with the same weights as  
262 described above, and extracted accompanying rho-values to assess the contribution of  
263 SKAT versus Burden Test for significant sets reflecting the proportion of bi- and  
264 unidirectionality of an association. In the case of rare- and joint tests only output based on >  
265 1 variant was considered, and in the case of joint tests the presence of both rare and  
266 common variants in the set was an additional requirement. P-values were Bonferroni-  
267 adjusted for each previously defined test separately, based on the number of groups tested.  
268 We did not apply additional corrections for the different grouping-levels (*i.e.* gene-level,  
269 subpathway-level, inflammatory-phenotype level), nor for the different variant frequency  
270 tests (*i.e.* SKAToC, SKATjoint, SKAToR, SKATO).

271

## 272 *Binary Trait*

273 In addition to the associations of continuous cytokine levels as described above  
274 (**Figure 1D.I**), we performed a binary association analysis on outlier individuals, here defined  
275 as extreme cytokine producers. As research has shown that individuals with outlier  
276 expression patterns are likely to be enriched in nearby rare variants(42-45), we  
277 hypothesized that outlier individuals in terms of cytokine production could similarly be  
278 enriched in rare variants in specific genes, thereby favoring the identification of stimulus-  
279 specific mechanisms. For this purpose, we defined for each cytokine-stimulus the 1%  
280 extreme cytokine producers (rounded up, so generally  $\pm 5$  individuals), which categorized the  
281 individuals in two groups that were subjected to binary trait association. Specifically, for each  
282 cytokine-stimulus combination the SKAToR was applied twice: 1) 1% highest cytokine  
283 producers versus all other individuals ( $_{TOPBT}$ , **Figure 1D.II**), and 2) 1% lowest cytokine

284 producers versus all other individuals ( $_{\text{LOWBT}}$ ; **Figure 1D.III**). In two cases, *C. albicans*-  
285 induced IL-1 $\beta$  production low-producers and LPS-induced IL-6 production high-producers,  
286 no distinctive categories could be created due to equal cytokine measurements at the 1%  
287 cut-off, and as such the groups were extended to 7 and 9 respectively. We followed up on  
288 associations based on >1 variant, that were nominally significant (unadjusted P-values) in  
289 the continuous associations and recurrent in either  $_{\text{TOPBT}}$  or  $_{\text{LOWBT}}$ .

290

### 291 *Follow Up*

292 In order to give meaning to our detected associations, we extracted the residual  
293 (corrected for covariates age and gender) cytokine production from the SKAT null-model and  
294 correlated those to the genotype categories, where applicable. For all plots, correlations and  
295 cytokine levels mentioned from hereon, the cytokine production therefore has been  
296 corrected for age and gender. In the case of set-based common variant associations we  
297 correlated cytokine production to the three separate genotype categories; homozygous  
298 reference, heterozygous, homozygous alternative, whereas in the case of set-based rare  
299 variant associations we correlated cytokine production to only two categories; absence or  
300 presence of one of the rare variants in the set.

301 Additionally, considering accumulating evidence for a role of non-coding genetic  
302 variation in health and disease(46, 47), we followed-up on common variant associations by  
303 using the publicly available genotype data from the FG500-cohort, generated with the  
304 commercially available SNP chip Illumina HumanOmniExpressExome-8v1.0 (for further  
305 details we refer to previously published work(18, 48)). We extracted all common variants  
306 (based on cohort AF  $\geq$  5%) within NCBI RefSeq 'Whole Gene' gene regions and extended  
307 the start position by 50kB(49) for the following sets: *IL36A*, *IL38*, IL-30s subpathway, pro-  
308 inflammatory phenotype and anti-inflammatory phenotype. Variant sets were pruned for  
309 Linkage Disequilibrium (LD) based within cohort metrics and the commonly used  $R^2$  cut-off  
310 of >0.8, by means of the snpStats package in R. The final pruned set of variants, termed  
311 tagSnps, were subjected to the same SKAT with default weights, to test for association with

312 continuous IL-1 $\beta$  (N=428) and IL-6 (N=425) cytokine production. Finally, for the purpose of  
313 correlating significant non-coding common variant sets to cytokine levels, we calculated an  
314 allelic score for all variants in the set. An allelic score is a way to collapse multidimensional  
315 genetic data associated with a risk factor into a single variable(50). We slightly adapted the  
316 allelic score calculation to our SKAT-based test results, into a weighted (based on AF-based  
317 Beta.Weights function from SKAT package), directional (based on increasing or decreasing  
318 cytokine production over the genotype categories) allelic score. Specifically, we inferred the  
319 direction of each variant in a set, and combined this with the manually computed variant  
320 weight, by negating the weight only for variants with decreasing cytokine production over the  
321 genotype categories. Common variant genotypes were converted to dosages and multiplied  
322 by their directional weight, which was summed up to an allelic score per set of variants. The  
323 weighted, directional allelic score was plotted versus the cytokine production, and a linear  
324 model equation and R<sup>2</sup> metrics were extracted. In addition, to evaluate the individual  
325 contribution of non-coding common variants in a set, we computed per SNP linear models  
326 using *C. albicans*-induced residual cytokine production as the criterion variable and the SNP  
327 in question as predictor variable. The individual SNP effect estimates (or Beta-estimates)  
328 were organized by direction and annotated based on their significance. For the purpose of  
329 prioritizing one SNP for investigating epigenetic effects we computed the same linear  
330 models now using the log-transformed cytokine production as criterion variable and next to  
331 the SNP also age and gender as covariates. The predictive capacity of the linear models, as  
332 reflected by the model p-value, was used as a measure for impact of a specific SNP on  
333 cytokine production and as such prioritized rs1562305 for more in-depth follow-up.  
334 Epigenetic effects of rs1562305 were studied using a Hi-C dataset(51) and Pol II ChiA-PET  
335 libraries for K562 (GSM970213). Transcription Factor ChiP-seq Clusters (338 factors, 130  
336 cell types) were obtained from ENCODE 3 Data version: Encode 3 Nov 2018.

337

338

339 **RESULTS**



340

#### 341 Study Cohort

342 Here, we studied healthy individuals from the Human Functional Genomics Project  
343 (HFGP; FG500-cohort)(30), by making use of the publicly available demographic data and  
344 stimuli-specific *in vitro* cytokine measurements(31). The gender distribution over 463  
345 included individuals for analysis shows a mild overrepresentation of females as compared to  
346 males (Male n=201, Female n=262), whereas the mean- and median age distribution for  
347 these groups separately is comparable (**Additional File 2A**).

348 *In vitro* IL-1 $\beta$  and IL-6 cytokine production in whole blood in response to stimulation  
349 with either 100ng/mL Lipopolysaccharide (LPS), 10 $\mu$ g/mL Phytohemagglutinin (PHA), heat-  
350 killed *Candida albicans* 10<sup>6</sup>CFU/mL (*C. albicans*) and 1x10<sup>6</sup>/mL *Staphylococcus aureus* (*S.*  
351 *aureus*), were likewise evenly distributed between females and males (**Additional File 2B**),  
352 and were log-transformed prior to analysis. Based on the above-mentioned distributions in  
353 combination with the fact that previous research has shown that age and gender can  
354 influence cytokine responses(17-20), both variables were included as covariates in our  
355 analyses.

356

#### 357 Sequencing

358 Molecular Inversion Probe (MIP)-based re-sequencing of all coding exons of the 48  
359 genes in our IL-1 pathway MIP-panel generated sequencing data from 520 healthy  
360 individuals (for all MIPs see **Additional File 3**). Overlapping the sequencing data with the  
361 available immunophenotyping data we managed to obtain complete datasets from 463  
362 individuals for analysis. The average coverage depth for these 463 individuals over all MIPs  
363 was 830x (**Additional File 4**). Five genes in our panel (*SIGIRR*, *PYCARD*, *CYBA*, *RAC2*  
364 and *MAP1LC3A*) were unfavorably covered (<100x average coverage of the entire coding  
365 part of the gene) for more than half of the samples, and one gene (*NCF1*) lost all coverage  
366 in our extensive quality filtering due to homology regions, and was therefore excluded from  
367 subsequent analysis (**Additional File 4**). Based on gene-encoding protein function and the

368 immunological cascade in which they are activated, these 48 genes were classified prior to  
369 the analysis into 1) six subpathway groups: IL-1 subpathway, IL-18 subpathway, IL-30s  
370 subpathway, Inflammasome, ROS-production and Autophagy; and 2) two inflammatory-  
371 phenotype groups: pro-inflammatory, and anti-inflammatory (**Additional File 1**).

372 Overall, we identified 201 non-synonymous variants in the coding exon regions, out  
373 of which 35 were common and 166 were rare (based on cohort allele frequencies (AFs)  
374 using a threshold of  $\geq 5\%$  for common variants). Furthermore, out of 166 rare variants we  
375 identified 18 variants to be novel, *i.e.* never observed before in public databases. For a  
376 complete variant list see **Additional File 5**.

377

### 378 Variant Analysis

379 The role of rare and common variants on stimuli-specific cytokine responses was  
380 assessed by a Rare Variant Burden Analysis (RVBA) using the Sequence Kernel  
381 Association Test (SKAT)(14, 40, 41). The main issue with rare variant association testing  
382 lies in the low-frequency of rare variants, and thus appropriate grouping is warranted(23,  
383 24). We performed the SKAT using three different grouping strategies (**Figure 1E** and  
384 **Additional File 1**): I) **gene-level**, where all variants within the coding region of each gene  
385 were considered; II) **subpathway-level**, where all coding variants within genes that belong  
386 to the corresponding subpathway were considered; and III) **inflammatory-phenotype level**,  
387 where genes were classified as either pro-inflammatory or anti-inflammatory based on  
388 encoded protein function, and all variants from genes in either group were considered. Each  
389 level was assessed for the role of genetic variants on stimuli-specific IL-1 $\beta$  and IL-6 cytokine  
390 production, through the full spectrum of AFs (from rare- to common (AF  $\geq 5\%$ ) variants  
391 separately and combined) by performing four different tests (**Figure 1G**): I.SKAToC; testing  
392 only common variants, II.SKAToR; testing only rare variants, III.SKATjoint; testing common  
393 and rare variants jointly by using a method that considers common variant effects as  
394 covariates in the rare variant test. To verify potentially missed strong unidirectional signals,  
395 the rare variants were additionally subjected to an adapted algorithm that uses a linear

396 combination of the SKAT and Burden Test, the SKAT-O (IV.SKATO). Output from all SKATs  
397 performed in this study can be found in **Additional File 6**.

398

399 *Association landscapes show similarities and differences in IL-1 $\beta$  and IL-6 response*

400 We created holistic heatmap overviews termed 'association landscapes', for the  
401 purpose of summarizing rare- and common variant associations, both on the gene and  
402 subpathway level, in an organized fashion. **Figure 2** shows these landscapes of gene- and  
403 subpathway based associations for IL-1 $\beta$  (**2A**) and IL-6 (**2B**) production by whole blood.  
404 **Figure 3** shows the inflammatory-phenotype based associations for IL-1 $\beta$  (**3A**) and IL-6 (**3B**)  
405 production by whole blood in classic rectangular heatmaps.

406 The **gene-level** analysis revealed significant associations between rare genetic  
407 variants in *NCF4* and both IL-1 $\beta$  and IL-6 cytokine production in response to PHA  
408 stimulation (SKAToR<sub>adj</sub>P-value=0.0126 and  $7.2E^{-05}$  respectively), that sustained when  
409 common variants were considered as covariates (SKATjoint<sub>adj</sub>P-value=0.0185 and  $1.3E^{-04}$   
410 for IL-1 $\beta$  and IL-6 respectively). Another strong rare variant signal was observed between  
411 *CASP1* rare variants and LPS-induced IL-6 cytokine production (SKAToR<sub>adj</sub>P-value= $3.0E^{-05}$ ).  
412 Next to this, common variants in *IL36A* and *IL38* were significantly associated to both IL-  
413 1 $\beta$  and IL-6 cytokine production after *C. albicans* stimulation (*IL36A* SKAToC<sub>adj</sub>P-  
414 value=0.0442 and 0.0037; *IL38* SKAToC<sub>adj</sub>P-value=0.0092 and 0.0082). These associations  
415 substantially weakened in the joint analysis of common and rare variants, with the exception  
416 of the *IL36A* association with IL-6 that remained comparable to the rare variant result  
417 (SKATjoint<sub>adj</sub>P-value=0.0070).

418 The **subpathway-level** analysis identified a significant association between rare  
419 genetic variants of IL-1 subpathway genes combined and LPS-induced IL-1 $\beta$  cytokine  
420 production (SKAToR<sub>adj</sub>P-value=0.0030), that maintained in the joint analysis with only a  
421 minor decrease in significance (SKATjoint<sub>adj</sub>P-value=0.0056). Specific to IL-6, we identified  
422 associations between rare variants in ROS-production genes after PHA stimulation  
423 (SKAToR<sub>adj</sub>P-value=0.0295), and rare variants in Inflammasome genes combined after LPS

424 stimulation (SKAToR<sub>adj</sub>P-value=3.7E<sup>-04</sup>), while only the latter remained in the joint analysis  
425 (SKATjoint<sub>adj</sub>P-value=4.7E<sup>-04</sup>). Finally, common variants in IL-30s subpathway genes were  
426 significantly associated with both IL-1 $\beta$  and IL-6 cytokine production in response to *C.*  
427 *albicans* stimulation (SKAToC<sub>adj</sub>P-value=0.0017 and 1.8E<sup>-04</sup> respectively), both slightly  
428 weaker in the joint analysis.

429 The **inflammatory-phenotype level** analysis (**Figure 3**), revealed a strong  
430 association between rare variants in genes with pro-inflammatory effects and LPS-induced  
431 IL-6 cytokine production (SKAToR<sub>adj</sub>P-value=2.42E<sup>-04</sup> and SKATO<sub>adj</sub>P-value=1.99E<sup>-03</sup>), that  
432 was recurrent in the joint analysis (SKATjoint<sub>adj</sub>P-value=3.60E<sup>-04</sup>). On the other hand, rare  
433 variants in anti-inflammatory genes were significantly associated with IL-6 cytokine  
434 production in response to *S. aureus* stimulation (SKATO<sub>adj</sub>P-value=6.71E<sup>-03</sup>). Moreover, we  
435 identified a role for common variants in anti-inflammatory genes in both IL-1 $\beta$  and IL-6  
436 cytokine production in response to *C. albicans* stimulation (SKAToC<sub>adj</sub>P-value=1.87E<sup>-03</sup> and  
437 5.75E<sup>-04</sup> respectively), that in the joint analysis persisted for IL-1 $\beta$  (SKATjoint<sub>adj</sub>P-  
438 value=7.11E<sup>-03</sup>), whereas in for IL-6 most of the signal was lost (SKATjoint<sub>adj</sub>P-  
439 value=0.0240). Finally, unique to *C. albicans*-induced IL-6 production, was an association  
440 with common variants in pro-inflammatory genes (SKAToC<sub>adj</sub>P-value=0.0153).

441

442 *Gene-level rare variant associations of cytokine outliers imply cytokine-stimulus specific*  
443 *features*

444 The associations presented thus far were produced by using stimulus-specific  
445 cytokine profiles of all individuals as continuous measurements. In order to uncover rare  
446 variant gene associations that may reflect strong stimulus-specific mechanisms, we  
447 supplemented these continuous trait associations (CT, **Figure 1D.I**), with extreme binary  
448 trait associations (BT). The BT associations were conducted by categorizing individuals into  
449 two groups, based on 1% highest and lowest cytokine production respectively, in response  
450 to a certain *in vitro* stimulus, from here on referred to as top-producers (TOPBT, **Figure 1D.II**)  
451 and low-producers (LOWBT, **Figure 1D.III**). Identifying recurrent rare variant associations (that

452 is, nominally significant in CT and either  $_{TOPBT}$  or  $_{LOWBT}$ ), allowed us to give meaning in  
453 terms of direction of the effect of our continuous association results. **Figure 4** shows  
454 recurrent gene-level rare variant association (SKAToR) P-values, separately for IL-1 $\beta$  (**A**)  
455 and IL-6 (**B**).

456 The analysis of extreme cytokine producers was consistent with our identified  
457 continuous association result between rare variants in *NCF4* and PHA-induced IL-1 $\beta$  and IL-  
458 6 cytokine production, by the identification of a recurrent signal in the low-producers (IL-1 $\beta$   
459  $_{LOWBT}$  P-value=2.18E<sup>-04</sup>; IL-6  $_{LOWBT}$  P-value=5.94E<sup>-05</sup>), along with the association between  
460 *CASP1* and IL-6 low-producers after LPS stimulation ( $_{LOWBT}$  P-value=0.0299). In addition to  
461 that, we identified three recurrent associations in IL-1 $\beta$  top-producers: rare variants in *IL1R2*  
462 after LPS (P-value=0.0429) and PHA stimulation (P-value=0.0493); *IL18BP* rare variants  
463 after *S. aureus* stimulation (P-value=0.0038); and four recurrent associations in LPS-induced  
464 IL-1 $\beta$  low-producers - rare variants in *NCF4* (P-value=8.27E<sup>-03</sup>), *IL1R1* (P-value=0.0194),  
465 *IL1RL2* (P-value=8.54E<sup>-04</sup>) and *IL36G* (P-value=3.03E<sup>-03</sup>) (**Figure 4A**). In the case of IL-6  
466 (**Figure 4B**) we detected one additional recurrent signal, that is *IL33* rare variants and top-  
467 producers after *C. albicans* stimulation (P-value=0.0143).

468

#### 469 *Immunological response to C. albicans reflects a common variant signature*

470 Our results of the SKAToC show strong common coding variant set signals over  
471 various levels of magnitude both on IL-1 $\beta$  and IL-6 cytokine production after *C. albicans*  
472 stimulation, reflecting a common variant signature in this immunological response. For the  
473 separate variants in *IL36A* (rs895497) and *IL38* (rs6761276 and rs6743376), we observed  
474 that the alternative allele presented with 1) a higher frequency as compared to the ancestral  
475 allele, and 2) a higher cytokine production (residual, after correcting for co-variables age and  
476 gender). **Figure 5A** shows that for each of these variants the IL-1 $\beta$  and IL-6 *in vitro* cytokine  
477 production in response to *C. albicans* stimulation decreases over the genotype categories.  
478 Complementary Wilcoxon-rank-sum tests confirmed that for all three variants homozygous  
479 reference versus homozygous alternative and heterozygous versus homozygous alternative,

480 was significantly associated with higher IL-1 $\beta$  and IL-6 cytokine production, and  
481 homozygous reference versus heterozygous only for *IL38* rs6743376 (**Figure 5A**).

482 While the rest of our study focused on coding variants, *i.e.* variants that likely have a  
483 direct effect on protein function, we additionally aimed to get insight into the impact of non-  
484 coding common variants. Indeed, accumulating evidence highlights a role for common non-  
485 coding genetic variation in human health(46, 47), in inflammatory responses(52, 53), and  
486 even specifically in innate immune responses(54-56). Therefore, for the purpose of  
487 replicating our coding common variant signals, we repeated our significantly associated  
488 common variant sets in this study with previously published genotyping data from the same  
489 (FG500) cohort containing coding and non-coding common genome-wide genetic  
490 variation(31). All common variants (cohort AF>0.05) within a set were pruned for Linkage  
491 Disequilibrium (LD), using within cohort  $R^2$  metrics. **Figure 5B** shows that by subjecting  
492 these expanded sets to the same SKAT, we identified associations between *C. albicans*-  
493 induced IL-6 production and non-coding common variants in *IL36A* (P-value=0.049), *IL38* (P-  
494 value=0.007) and pro-inflammatory genes (P-value=0.019), and between *C. albicans*-  
495 induced IL-1 $\beta$  production and non-coding common variants in *IL38* (P-value=0.046). We  
496 visualized these associations by calculating an allelic score, with single SNP directions and  
497 MAF-based variant weights incorporated, for all significant sets in **5B**. In **Figure 5C** the  
498 weighted directional allelic score is displayed in correlation with cytokine production,  
499 demonstrating that for each set there is an increasing cytokine production with increasing  
500 score, highest for *IL38* set with a correlation ( $R^2$ ) of 0.025. Finally, to evaluate the individual  
501 contribution of non-coding common variants in a set, we organized single SNP effect  
502 estimates based on their direction and significance (**Additional File 7**). A more in-depth  
503 follow up on *IL36A* set non-coding SNP rs1562305, revealed its non-coding activity by a  
504 combination of an interaction with *IL36G* and *IL36A* based on K562 Hi-C data and Pol II-  
505 associated chromosomal contacts are observed in the regions surrounding rs1562305 and  
506 *IL36A* (**Additional File 8A and B**). Moreover, rs1562305 falls within a region that is bound

507 by several transcription factors, including *HNF4A*, that has been associated with ulcerative  
508 colitis and diabetes mellitus type II (**Additional File 8C**)(57).

509

510

## 511 **DISCUSSION**

512

513 In this study we identify and characterize rare and common genetic variation in genes  
514 related to the IL-1 pathway, and determine their impact on the inter-individual variability of  
515 stimulus-specific *in vitro* cytokine responses, measured in whole blood from healthy  
516 individuals. In addition, we assess the relative contribution of rare as compared to common  
517 variants, as well as the joint effect of rare and common variants, by employing various  
518 grouping strategies.

519 Over the past decades, multiple studies have identified a role for common genetic  
520 variation on cytokine level and response, however a significant proportion of inter-individual  
521 variability remains to be determined(17-20). Common and rare variants have mostly been  
522 studied separately, and the differentiation between them is an arbitrary decision.  
523 Considering increasing evidence that specific combinations of variants with variable  
524 frequencies accounts for variability in phenotypic presentation(12-14), in particular for a  
525 combination of phenotypic characteristics that do not fit one specific clinical diagnosis(58),  
526 we hypothesized this concept might also apply to the inter-individual variability in cytokine  
527 responses. As such, this study aimed to provide a more holistic view, that considers the  
528 interplay of variants of different allele frequencies. For this purpose, we sequenced the  
529 coding regions of 48 genes related to the IL-1 pathway in almost 500 healthy individuals,  
530 and assessed *in vitro* IL-1 $\beta$  and IL-6 production by whole blood in response to LPS, PHA, *C.*  
531 *albicans* and *S. aureus*. By means of the Sequence Kernel Association Test (SKAT), we  
532 tested for association between cytokine production and only common- (SKAToC), only rare-  
533 (SKAToR), and common and rare variants combined (SKATjoint), over various levels of  
534 grouping strategies; gene-, subpathway, and inflammatory-phenotype groups.



535

536           The strongest rare variant association detected in this study was between *CASP1*  
537 and LPS-induced IL-6 cytokine production. *CASP-1* protein, encoded by *CASP1* gene, is  
538 responsible for cleavage of the inactive mediators IL-1 $\beta$ , IL-18 and IL-33 into their active  
539 form. The association in this study was based on five rare variants: two private variants (one  
540 new to public databases); two variants identified in two individuals in heterozygous state,  
541 and one variant identified in five individuals in homozygous state (see **Additional File 5**).  
542 The fact that we observed a burden of rare variants not with IL-1 $\beta$  but with IL-6 production,  
543 may suggest an unknown effect of *CASP-1* on IL-6 production and/or release, although this  
544 is a speculation and remains to be demonstrated in future studies. Alternatively, immune  
545 responses are highly dynamic and as such can be influenced differentially by genetics over  
546 time(59), and since we used cytokine measurements after 48 hours of stimulation, it could  
547 also reflect an unnoticed effect of these variants on preceding IL-1 $\beta$  production, that  
548 subsequently influence the induction of IL-6.

549           We detected an almost equally strong rare variant burden between *NCF4* and both  
550 IL-1 $\beta$  and IL-6 production in response to PHA stimulation. This association was based on  
551 three private rare variants, one of which is new to public databases. Two variants are  
552 located in the canonical splice-acceptor sites, thereby possibly affecting the splicing of this  
553 gene, which most likely leads to loss-of-function variants with reduced RNA and possibly  
554 protein levels as a consequence. The *NCF4* gene encodes the *NCF4* protein which is part of  
555 the cytoplasmic unit of the NADPH (nicotinamide adenine dinucleotide phosphate) oxidase  
556 enzyme system involved in phagocytosis(60). Variation in NADPH related genes are  
557 clinically relevant for human immunity as, rare mutations have been linked to chronic  
558 granulomatous disease (CGD, a primary immunodeficiency), and common variants have  
559 been associated with immune related diseases like Crohn's disease and systemic lupus  
560 erythematoses (SLE)(61, 62). Knock-out of *Ncf4* in mice results in a defective NADPH-  
561 complex, with as a consequence reduced ROS-production and inefficient phagocytosis,  
562 ultimately leading to increased cytokine production(63, 64). The association detected in this



563 study between *NCF4* rare variants and decreased cytokine production therefore suggests a  
564 gain-of-function effect on the NADPH-complex. However, considering the splice-affecting  
565 characteristics of two of these rare variants, the resulting effect on the NADPH oxidase  
566 system remains inconclusive and requires further investigation.

567 In addition, our study revealed an association between rare variants in anti-  
568 inflammatory genes and *S. aureus*-induced IL-6 production. The unidirectional characteristic  
569 of this was reflected by the observation that in whole blood from individuals carrying a rare  
570 variant more IL-6 cytokine was produced in response to *S. aureus*, as confirmed by  
571 Wilcoxon rank-sum P-value=0.0054 (**Figure 3C**). Remarkably, more than half of the anti-  
572 inflammatory genes are autophagy genes, which is in line with the notion that defective  
573 autophagy results in increased cytokine production, with increased inflammatory disease  
574 severity, like colitis and CGD, as a consequence(63, 65).

575

576 An intrinsic issue with rare variants is their low-frequency, resulting in limited power  
577 for association testing(66). Combining multiple rare variants followed by appropriate  
578 combination tests can improve power, but requires prior knowledge on the biological effects  
579 of the genes studied. Our IL-1 subpathway rare variant association with LPS-induced IL-1 $\beta$   
580 production confirms that appropriate grouping produces a significant association (SKAToR  
581  $_{adj}$ P-value=0.003), even though the individual genes did not (**Figure 2A**). The most likely  
582 reason for this is insufficient power, and indeed a thorough inspection of the raw data  
583 disclosed significant underlying gene-level association P-values that did not survive the  
584 Bonferroni-adjustment. The subpathway level association between common variants in  
585 genes of the IL-30s subpathway and IL-6 production in response to *C. albicans*, illustrates  
586 that even for common variants appropriate grouping can increase power. For instance, the  
587 IL-30s subpathway association with *C. albicans* stimulated IL-6 cytokine we detected, was  
588 more significant than could be explained by the gene-level associations with *IL36A* and *IL38*.  
589 Even though common variants in other members of the respective subpathway (*i.e.* *SIGIRR*  
590 and *IL37*) individually were not associated, most likely they do contribute to the subpathway

591 signal. The *C. albicans*-specific common variant signature identified in this study by  
592 combining multiple common variants in a set over several levels of magnitude, additionally  
593 supports Smeekens et al.(67), where they identified the innate immune pathway to be  
594 induced by *C. albicans*. Next to highlighting the role for coding common variants, our  
595 validation with non-coding common variants in the same cohort supports the importance of  
596 considering interplay between multiple common variants, and additionally substantiates the  
597 urge for studying the impact of epigenetic regulation in immunity(68). Moreover, we identified  
598 a potential epigenetic mechanism that may allow insights into the gene regulation by non-  
599 coding variants, for rs1562305 on *IL36A* and *IL36G* gene expression levels (**Additional File**  
600 **8**).

601 Another method to increase power in rare variant association studies, is to use  
602 extreme phenotypes for the purpose of enriching rare variants with strong(er) effects in  
603 outlier individuals(24, 44, 45). In this study, we used 1% extreme cytokine producers in a  
604 binary association and overlapped the results with our continuous tests, for the purpose of 1)  
605 characterization of stimulus-specific mechanisms, and 2) providing an indication of direction.  
606 Our strongest continuous rare variant associations (*CASP1* with LPS-induced IL-6 cytokine  
607 and *NCF4* with PHA-induced IL-1 $\beta$  and IL-6 cytokine), reemerged in low-responders. The  
608 fact that these associations were identified both in our continuous and binary analyses, is in  
609 line with the finding that extreme phenotyping can enrich for the presence of rare causal  
610 variants(44, 45). Remarkably, our *NCF4* private variant carriers were restricted to the 1%  
611 lowest PHA-induced IL-6 cytokine response, substantiating that most extreme variants (in  
612 terms of lowest frequency) can have most extreme effects on the phenotype level(39, 69-  
613 71). In addition, we identified recurrent associations between LPS-induced IL-1 $\beta$  cytokine  
614 production and five genes of the IL-1 subpathway, substantiating the subpathway level  
615 association and at the same time reflecting lack of power in the identification of individual  
616 gene associations. Interestingly, we identified an association between *S. aureus*-induced IL-  
617 1 $\beta$  cytokine production and rare variants in *IL18BP*, recurrent in the top-responders. The  
618 encoded protein (IL-18BP) exerts major anti-inflammatory effects by inhibiting IL-18

619 signaling(72), and previous studies have shown that IL-18BP levels are negatively correlated  
620 with cytokine production by lymphocytes(17). The identified burden in top-responders here,  
621 suggests that rare variants in *IL18BP* negatively affect IL-18BP levels, allowing for higher *S.*  
622 *aureus*-induced cytokine production. The role of IL-18/IL-18BP pathway in cytokine  
623 responses to *Staphylococci* therefore needs further investigation, as it has the potential to  
624 provide important new insights in severe diseases caused by this pathogenic microorganism  
625 (e.g. sepsis).

626

627 Our study cohort is one of the largest to date in which extensive immunophenotyping  
628 experiments have been performed(17, 18, 20). The associations described here are based  
629 on cytokine production by whole blood, as it is most comparable to the *in vivo* situation and  
630 therefore most representative for physiologic immune responses. Furthermore, the  
631 investigated stimuli were chosen as representatives for an array of microbial infections,  
632 specifically: LPS is expressed on the bacterial cell wall of Gram-negative bacteria; PHA is  
633 synthesized by *Bacillus Rhodococcus* and *Pseudomonas species*; and *C. albicans* and *S.*  
634 *aureus* are major invading pathogens representative of fungi and Gram-positive bacteria,  
635 respectively. Future efforts investigating a broader array of pathogens, as well as specific  
636 contribution of immune cell subtypes, based on the additional publicly available data for this  
637 cohort(31) is therefore highly recommended. Nevertheless, potential limitations of this study  
638 cohort include the relatively small sample size and cohort characteristics (restricted age  
639 distribution and residency), and replication in a larger cohort for validation is favorable.  
640 Secondly, despite the cost-effectiveness of MIP-sequencing (e.g. ± €25,- per sample for the  
641 IL-1 panel), larger intronic or non-coding regions are not sequenced and as such escape  
642 analysis. The potential of using whole genome sequencing data to investigate the role of  
643 rare non-coding genetic variation, thereupon seems promising. Thirdly, the SKAT is  
644 powerful, but computes only set-wise association P-values and does not provide single  
645 variant effect estimates, neither does it provide direction in terms of positive/negative effects  
646 or increased/decreased risk. As we cannot exclude interaction effects between variants in a

647 set, the contribution of single variants to a phenotype is difficult to estimate and as such the  
648 clinical applicability remains complex and requires more in-depth follow-up. Lastly, this study  
649 was designed for the purpose of discovering correlations between genetic variants and  
650 functional cytokine read-outs, but with the prospect of future, in-depth functional follow-up  
651 studies. In order to maximize the discovery layer, we Bonferroni-adjusted p-values based on  
652 the number of groups tested per stimulus-cytokine combination, frequency and grouping-  
653 level, and as such we did not apply post-hoc corrections.

654

655

## 656 **CONCLUSIONS**

657 In conclusion, this study shows that common and rare genetic variation in genes of  
658 the IL-1 pathway, separately and combined, differentially influence *in vitro* IL-1 $\beta$  and IL-6  
659 cytokine responses induced by various stimuli. Not only do we add to the knowledge on the  
660 role of common variants in the IL-1 pathway, we additionally highlight the important role of  
661 rare variants (alone or in combination) on immune response variability. On a broader  
662 perspective, this study provides insight into potential mechanisms that are translatable to  
663 new hypothesis-driven identification of rare variant involvement in inflammatory and  
664 immunological mechanisms and diseases. Over and above, the framework used in this  
665 study is expandable to a wide variety of (non-immune) complex phenotypes, and as such  
666 can lead the way to new insights and theories for any phenotype of interest, and therefore  
667 has the potential to contribute to better understanding of unresolved, complex diseases.

668

669

## 670 **ADDITIONAL FILES**

671 *Additional File 1.* Variant grouping strategies of 48 Interleukin-1 pathway related genes.

672 *Additional File 2.* Baseline characteristics of healthy individuals (n=463).

673 *Additional File 3.* Molecular Inversion Probes (MIPs) covering all coding exons of 48 genes  
674 of the Interleukin-1 pathway.

675 *Additional File 4.* Average coverage depth per gene and overall for healthy individuals  
676 (n=463) included in analysis.

677 *Additional File 5.* Complete variant list.

678 *Additional File 6.* All SKAT output.

679 *Additional File 7.* Non-coding SNP set effect estimates distribution.

680 *Additional File 8.* Epigenetic effects of IL36A set non-coding SNP rs1562305.

681

## 682 **ABBREVIATIONS**

683 <sub>adj</sub>P-value: Bonferroni-adjusted P-value; AF: Allele frequency; AoSD: Adult-onset Still's  
684 Disease; BAQ: Base Alignment Quality; BT: Binary trait; BWA-MEM: Burrows-Wheeler  
685 Aligner; *C. albicans*: *Candida albicans*; CADD: Combined Annotation Dependent Depletion;  
686 CAPS: Cryopyrin associated periodic syndromes; CFU: Colony-forming unit; CGD: Chronic  
687 granulomatous disease; ChiA-PET: Chromatin interaction analysis with paired-end tag;  
688 ChiP-seq: Chromatin immunoprecipitation sequencing; CT: Continuous trait; dbSnp: Single  
689 Nucleotide Polymorphism Database; DIRA: DIRA: Deficiency of IL-1 receptor antagonist;  
690 DNA: Desoxyribonucleic acid; *e.g.*: *exempli gratia*; ELISA: Enzyme-linked immunosorbent  
691 assay; ExAc: Exome Aggregation Consortium; FG: Functional Genomics; GATK: Genome  
692 Analysis Toolkit; gnomAD: Genome Aggregation Database; GWAS: Genome Wide  
693 Association Studies; HFGP: Human Functional Genomics Project; *i.e.*: *id est*; IL-1 $\beta$ :  
694 Interleukin-1 $\beta$  ; IL-6: Interleukin-6; IL: Interleukin; kB: Kilobase; LD: Linkage disequilibrium;  
695 <sub>LOW</sub>BT: Binary trait association analysis using 1% lowest cytokine producers; LPS:  
696 Lipopolysaccharide; MAF: Minor allele frequency; MAS: Macrophage activation syndrome;  
697 MIP: Molecular Inversion Probe;  $\mu$ g: Microgram;  $\mu$ L: Microliter; mL: Milliliter; NADPH:  
698 Nicotinamide adenine dinucleotide phosphate; NCBI RefSeq: National Center for  
699 Biotechnology Information Reference Sequence; ng: Nanogram; PHA: Phytohaemagglutinin;  
700 PMNs: Polymorphonuclear cells; QUAL: Quality parameter in vcf; R<sup>2</sup>: Correlation metric; RA:  
701 Rheumatoid arthritis; Radboudumc: Radboud university medical center; RNA: Ribonucleic  
702 acid; ROS: Reactive Oxygen Species; RVBA: Rare variant burden analysis; *S. aureus*:

703 *Staphylococcus aureus*; SKAT: Sequence Kernel Association Test; SKATjoint: SKAT  
704 common and rare variants; SKATO/SKAT-O: linear combination of the Burden Test and  
705 SKAT with optimal weights; SKAToC: SKAT only common variants; SKAToR: SKAT only  
706 rare variants; SLE: Systemic lupus erythematoses; SNP: Single Nucleotide Polymorphism;  
707 tagSnps: Set of LD-pruned SNPs; <sub>TOP</sub>BT: Binary trait association analysis using 1% highest  
708 cytokine producers; vcf: Variant Call Format; VEP: Variant Effect Predictor

709

## 710 **ACKNOWLEDGEMENTS**

711 The authors thank the Radboud Genomics Technology Center, Radboud University Medical  
712 Center (Radboudumc), Nijmegen for support in sequencing. LABJ was supported by a  
713 Competitiveness Operational Programme grant of the Romanian Ministry of European  
714 Funds (HINT, P\_37\_762, MySMIS 103587). CAD was supported by NIH AI-15614. MMM  
715 was supported by the South African Medical Research Council, Department of Science &  
716 Technology of South Africa, Chan Zuckerberg Initiative and Bill & Melinda Gates  
717 Foundation. VK was supported by Hypatia tenure track fellowship. MGN was supported by  
718 the Nederlandse Organisatie voor Wetenschappelijk onderzoek (Spinoza grant), and the  
719 European Research Council (grant agreement No 310372). FLV and AH were supported by  
720 the Interleukin Foundation. AH was supported by the SOLVE-RD project, funded by the  
721 European Union's Horizon 2020 research and innovation programme under grant agreement  
722 No 779257.

723

## 724 **AUTHOR CONTRIBUTIONS**

725 MGN, FLvdV and AH designed the project. RCvD, MGN, AH conceptualized the  
726 experiments and analysis. PA, MJ, MS performed the experiments. RCvD performed data  
727 analysis and data visualization. MvdV and CG supported the data analysis. MMM performed  
728 additional data analysis. GC, VK, CAD, LABJ, FLvdV and MGN helped with data  
729 interpretation. RCvD, MGN and AH wrote the manuscript. All authors contributed to and  
730 approved the final manuscript.

731

## 732 **CONFLICT OF INTEREST**

733 LABJ reports to be Scientific Advisory Board member of Olatec Therapeutics LLC. CAD  
734 serves as chair of SAB of Olatec Therapeutics LLC. All other authors declare that they have  
735 no conflict of interest.

736

## 737 **DATA AVAILABILITY**

738 All demographic-, immunophenotyping- and genotyping- data from the FG500-cohort used in  
739 this study is publicly available on the BBMRI-NL archive(31). All variants called in MIP-  
740 sequencing data based on the IL-1 panel from the same cohort are published here, as well  
741 as all association results.

742

## 743 **CODE AVAILABILITY**

744 Code for processing and filtering MIP-based sequencing data are extensively explained in  
745 the methods section of this manuscript and will be made available upon reasonable request.  
746 The source code from the R packages used in this study are freely available online. Code for  
747 processing the output and generating the figures will likewise be made available upon  
748 reasonable request.

749

750

## 751 **FIGURES**

752

753 **Figure 1. Flowchart of the study workflow method.** Figure orientation from top to bottom.  
754 Blood was extracted from 520 healthy individuals **(A)** on which extensive  
755 immunophenotyping was performed **(B)** and simultaneously Molecular Inversion Probe  
756 sequencing data was produced from coding regions of 48 Interleukin-1 pathway genes **(C)**.  
757 The resulting cytokine production after stimulation was measured and used for analysis **(D)**:  
758 I.Continuous, using log-transformed IL-1 $\beta$  and IL-6 cytokine production upon stimulation;

759 II.Binary TOP, testing the 1% highest IL-1 $\beta$  and IL-6 cytokine producers versus the rest;  
760 III.Binary LOW, testing the 1% lowest IL-1 $\beta$  and IL-6 cytokine producers versus the rest.  
761 Similarly, the identified variants were grouped over three different regions into sets based on  
762 gene-encoded protein function **(E)**: I.Gene-level, with 48 gene-groups; II.Subpathway-level,  
763 with 6 subpathway-groups; and III.Inflammatory-level, with 2 inflammatory-groups. Variants  
764 within each set were appropriately weighed based on Minor Allele Frequency (MAF), and  
765 common- and rare variants were classified based on cohort Allele Frequency (AF) threshold  
766 of 0.05 **(F)**. Finally, variant analysis was performed by the Sequence Kernel Association Test  
767 (SKAT): I.SKAToC, SKAT with only common variants; II.SKATjoint, SKAT with common and  
768 rare variants; III.SKAToR, SKAT with only rare variants, and IV.SKATO; best combination of  
769 the SKAT and Burden Test with only rare variants **(G)**.

770

771 **Figure 2. Circular heatmaps of SKAT<sub>adj</sub>P-values.** The circular heatmaps consist of three  
772 rings separated by black lanes, representing from inner to outer the SKAToC (SKAT with  
773 only common (AF  $\geq$  5%) variants), SKATjoint (SKAT with common and rare variants), and  
774 SKAToR (SKAT with only rare variants) <sub>adj</sub>P-values with log-transformed IL-1 $\beta$  **(A)** and IL-6  
775 **(B)** cytokine production respectively. Each ring consists of 8 lanes, that represent different  
776 stimuli; 1) LPS 100ng/mL, 2) PHA 10 $\mu$ g/mL, 3) *C. albicans* 10<sup>6</sup>CFU/mL, 4) *S. aureus*  
777 1x10<sup>6</sup>/mL, with sub lane a) showing the subpathway-level result and sub lane b) showing the  
778 gene-level result. The genes annotated at the surface of the heatmap are underlined with a  
779 red, green or grey color, representing their classification in the inflammatory-phenotype level  
780 groups **(Figure 3)**.

781

782 **Figure 3. Inflammatory-phenotype level SKAT<sub>adj</sub>P-values.** A heatmap representation of  
783 association between inflammatory-phenotype groups and IL-1 $\beta$  **(A)** and IL-6 **(B)** cytokine  
784 production in response to four different stimuli; LPS 100ng/mL, PHA 10 $\mu$ g/mL, heat-killed *C.*  
785 *albicans* 10<sup>6</sup>CFU/mL, and *S. aureus* 1x10<sup>6</sup>/mL. Variants in genes categorized as pro- or anti-  
786 inflammatory were subjected to four different association tests; SKAToC (common (AF  $\geq$



787 5%) variants only), SKATjoint (common and rare variants), SKAToR (rare variants only), and  
788 SKATO (combination of SKAT and Burden Test with rare variants only). **(C)** shows a boxplot  
789 of *S. aureus* stimulated residual IL-6 cytokine production (corrected for age and gender) over  
790 rare variant categories (NO=individuals without rare variant; YES=individuals carrying a rare  
791 variant) within genes of the anti-inflammatory phenotype group. Wilcoxon rank-sum test P-  
792 value reveals a significant difference between the two categories.

793

794 **Figure 4. Extreme cytokine producers provide direction and identify distinct cytokine-**  
795 **stimulus specific features.** A heatmap representation of all recurrent gene-level rare  
796 variant SKAT P-values, where recurrence is defined per cytokine-stimulus combination as a  
797 nominal significant P-value in either top- or low-producers in addition to a nominal significant  
798 P-value in the corresponding continuous association. Association between rare variants and  
799 IL-1 $\beta$  **(A)** and IL-6 **(B)** cytokine production in response to LPS 100ng/mL **(i.)**, PHA 10 $\mu$ g/mL  
800 **(ii.)**, *C. albicans* 10<sup>6</sup>CFU/mL, and *S. aureus* 1x10<sup>6</sup>/mL stimulation **(iv.)**. Annotation: <sub>LOW</sub>BT =  
801 SKATBinary with lowest 1% producers; CT = SKAT with log-transformed continuous  
802 cytokine producers; <sub>TOP</sub>BT = SKATBinary with highest 1% cytokine producers.

803

804 **Figure 5. Coding and non-coding common variant set associations with *C. albicans***  
805 **induced cytokine production. (A)** shows that the residual IL-1 $\beta$  (left-panel in blue) and IL-6  
806 (right-panel in red) cytokine production for coding SNPs in *IL36A* and *IL38* decreases over  
807 the genotype categories. For all plots the ancestral allele is the minor allele and thus the  
808 genotype categories are ordered from left to right: homozygous alternative (IL-1 $\beta$  in light-  
809 blue and IL-6 in light-red), heterozygous (IL-1 $\beta$  in mid-blue and IL-6 in mid-red), homozygous  
810 ancestral (IL-1 $\beta$  in light-blue and IL-6 in light-red). **(B)** confirms that next to coding common  
811 variants, also non-coding common variants in *IL36A*, *IL38* and Pro-inflammatory phenotype  
812 sets are associated with *C. albicans* induced residual IL-6 cytokine production, and *IL38* set  
813 with *C. albicans* induced residual IL-1 $\beta$  cytokine production. **(C)** shows the Beta-weighted,  
814 directional, allelic score in correlation with *C. albicans* induced residual IL-1 $\beta$  or IL-6 cytokine

815 production. The straight line represents the linear model equation using method 'lm' with  
816 standard error of 0.95, and the  $R^2$  (measure of correlation) is displayed in the plot.  
817 Annotation: \* = P-value < 0.05; \*\* = P-value < 0.01.

818

819

820

## 821 REFERENCES

822

- 823 1. Parham P, Janeway CI. The immune system. 3rd ed. ed. London: Garland Science; 2009.
- 824 2. Dinarello CA. Overview of the IL-1 family in innate inflammation and acquired immunity.  
825 Immunol Rev. 2018;281(1):8-27.
- 826 3. Garlanda C, Dinarello CA, Mantovani A. The interleukin-1 family: back to the future. Immunity.  
827 2013;39(6):1003-18.
- 828 4. Sun Q, Fan J, Billiar TR, Scott MJ. Inflammasome and autophagy regulation - a two-way  
829 street. Mol Med. 2017;23:188-95.
- 830 5. Dinarello CA. The IL-1 family of cytokines and receptors in rheumatic diseases. Nat Rev  
831 Rheumatol. 2019;15(10):612-32.
- 832 6. Palomo J, Dietrich D, Martin P, Palmer G, Gabay C. The interleukin (IL)-1 cytokine family--  
833 Balance between agonists and antagonists in inflammatory diseases. Cytokine. 2015;76(1):25-37.
- 834 7. Jesus AA, Goldbach-Mansky R. IL-1 blockade in autoinflammatory syndromes. Annu Rev  
835 Med. 2014;65:223-44.
- 836 8. Wjst M, Sargurupremraj M, Arnold M. Genome-wide association studies in asthma: what they  
837 really told us about pathogenesis. Curr Opin Allergy Clin Immunol. 2013;13(1):112-8.
- 838 9. Korver SK, Gibson RJ, Bowen JM, Collier JK. Toll-like receptor/interleukin-1 domain innate  
839 immune signalling pathway genetic variants are candidate predictors for severe gastrointestinal  
840 toxicity risk following 5-fluorouracil-based chemotherapy. Cancer Chemother Pharmacol.  
841 2019;83(2):217-36.
- 842 10. Tekola Ayele F, Doumatey A, Huang H, Zhou J, Charles B, Erdos M, et al. Genome-wide  
843 associated loci influencing interleukin (IL)-10, IL-1Ra, and IL-6 levels in African Americans.  
844 Immunogenetics. 2012;64(5):351-9.

- 845 11. He M, Cornelis MC, Kraft P, van Dam RM, Sun Q, Laurie CC, et al. Genome-wide association  
846 study identifies variants at the IL18-BCO2 locus associated with interleukin-18 levels. *Arterioscler*  
847 *Thromb Vasc Biol.* 2010;30(4):885-90.
- 848 12. Chung RH, Kang CY. A Powerful Gene-Based Test Accommodating Common and Low-  
849 Frequency Variants to Detect Both Main Effects and Gene-Gene Interaction Effects in Case-Control  
850 Studies. *Front Genet.* 2017;8:228.
- 851 13. Hsieh AR, Chen DP, Chattopadhyay AS, Li YJ, Chang CC, Fann CSJ. A non-threshold  
852 region-specific method for detecting rare variants in complex diseases. *PLoS One.*  
853 2017;12(11):e0188566.
- 854 14. Ionita-Laza I, Lee S, Makarov V, Buxbaum JD, Lin X. Sequence kernel association tests for  
855 the combined effect of rare and common variants. *Am J Hum Genet.* 2013;92(6):841-53.
- 856 15. Wagih O, Galardini M, Busby BP, Memon D, Typas A, Beltrao P. A resource of variant effect  
857 predictions of single nucleotide variants in model organisms. *Mol Syst Biol.* 2018;14(12):e8430.
- 858 16. Boyle EA, Li YI, Pritchard JK. An Expanded View of Complex Traits: From Polygenic to  
859 Omnigenic. *Cell.* 2017;169(7):1177-86.
- 860 17. Bakker OB, Aguirre-Gamboa R, Sanna S, Oosting M, Smeekens SP, Jaeger M, et al.  
861 Integration of multi-omics data and deep phenotyping enables prediction of cytokine responses. *Nat*  
862 *Immunol.* 2018;19(7):776-86.
- 863 18. Li Y, Oosting M, Smeekens SP, Jaeger M, Aguirre-Gamboa R, Le KTT, et al. A Functional  
864 Genomics Approach to Understand Variation in Cytokine Production in Humans. *Cell.*  
865 2016;167(4):1099-110 e14.
- 866 19. Piasecka B, Duffy D, Urrutia A, Quach H, Patin E, Posseme C, et al. Distinctive roles of age,  
867 sex, and genetics in shaping transcriptional variation of human immune responses to microbial  
868 challenges. *Proc Natl Acad Sci U S A.* 2018;115(3):E488-E97.
- 869 20. Ter Horst R, Jaeger M, Smeekens SP, Oosting M, Swertz MA, Li Y, et al. Host and  
870 Environmental Factors Influencing Individual Human Cytokine Responses. *Cell.* 2016;167(4):1111-24  
871 e13.
- 872 21. Kim S, Becker J, Bechheim M, Kaiser V, Noursadeghi M, Fricker N, et al. Characterizing the  
873 genetic basis of innate immune response in TLR4-activated human monocytes. *Nat Commun.*  
874 2014;5:5236.

- 875 22. Scepanovic P, Alanio C, Hammer C, Hodel F, Bergstedt J, Patin E, et al. Human genetic  
876 variants and age are the strongest predictors of humoral immune responses to common pathogens  
877 and vaccines. *Genome Med.* 2018;10(1):59.
- 878 23. Asimit J, Zeggini E. Testing for rare variant associations in complex diseases. *Genome Med.*  
879 2009;1(11):24.
- 880 24. Auer PL, Lettre G. Rare variant association studies: considerations, challenges and  
881 opportunities. *Genome Med.* 2015;7(1):16.
- 882 25. Bodmer W, Bonilla C. Common and rare variants in multifactorial susceptibility to common  
883 diseases. *Nat Genet.* 2008;40(6):695-701.
- 884 26. Hiatt JB, Pritchard CC, Salipante SJ, O'Roak BJ, Shendure J. Single molecule molecular  
885 inversion probes for targeted, high-accuracy detection of low-frequency variation. *Genome Res.*  
886 2013;23(5):843-54.
- 887 27. Jansen S, Hoischen A, Coe BP, Carvill GL, Van Esch H, Bosch DGM, et al. A genotype-first  
888 approach identifies an intellectual disability-overweight syndrome caused by PHIP haploinsufficiency.  
889 *Eur J Hum Genet.* 2018;26(1):54-63.
- 890 28. Neveling K, Mensenkamp AR, Derks R, Kwint M, Ouchene H, Steehouwer M, et al. BRCA  
891 Testing by Single-Molecule Molecular Inversion Probes. *Clin Chem.* 2017;63(2):503-12.
- 892 29. O'Roak BJ, Vives L, Fu W, Egertson JD, Stanaway IB, Phelps IG, et al. Multiplex targeted  
893 sequencing identifies recurrently mutated genes in autism spectrum disorders. *Science.*  
894 2012;338(6114):1619-22.
- 895 30. Human Functional Genomics Project Home Site.  
896 <http://www.humanfunctionalgenomics.org/site/>. Accessed 8 April 2019.
- 897 31. Human Functional Genomics Project BBMRI-NL archive. <https://hfgp.bbMRI.nl/>. Accessed 8  
898 April 2019.
- 899 32. Boyle EA, O'Roak BJ, Martin BK, Kumar A, Shendure J. MIPgen: optimized modeling and  
900 design of molecular inversion probes for targeted resequencing. *Bioinformatics.* 2014;30(18):2670-2.
- 901 33. Li H, Durbin R. Fast and accurate short read alignment with Burrows-Wheeler transform.  
902 *Bioinformatics.* 2009;25(14):1754-60.

- 903 34. Van der Auwera GA, Carneiro MO, Hartl C, Poplin R, Del Angel G, Levy-Moonshine A, et al.  
904 From FastQ data to high confidence variant calls: the Genome Analysis Toolkit best practices  
905 pipeline. *Curr Protoc Bioinformatics*. 2013;43:11 0 1- 0 33.
- 906 35. Smigielski EM, Sirotkin K, Ward M, Sherry ST. dbSNP: a database of single nucleotide  
907 polymorphisms. *Nucleic Acids Res*. 2000;28(1):352-5.
- 908 36. Li H, Handsaker B, Wysoker A, Fennell T, Ruan J, Homer N, et al. The Sequence  
909 Alignment/Map format and SAMtools. *Bioinformatics*. 2009;25(16):2078-9.
- 910 37. McLaren W, Gil L, Hunt SE, Riat HS, Ritchie GR, Thormann A, et al. The Ensembl Variant  
911 Effect Predictor. *Genome Biol*. 2016;17(1):122.
- 912 38. Kircher M, Witten DM, Jain P, O'Roak BJ, Cooper GM, Shendure J. A general framework for  
913 estimating the relative pathogenicity of human genetic variants. *Nat Genet*. 2014;46(3):310-5.
- 914 39. Lek M, Karczewski KJ, Minikel EV, Samocha KE, Banks E, Fennell T, et al. Analysis of  
915 protein-coding genetic variation in 60,706 humans. *Nature*. 2016;536(7616):285-91.
- 916 40. Wu MC, Lee S, Cai T, Li Y, Boehnke M, Lin X. Rare-variant association testing for  
917 sequencing data with the sequence kernel association test. *Am J Hum Genet*. 2011;89(1):82-93.
- 918 41. Lee S, Emond MJ, Bamshad MJ, Barnes KC, Rieder MJ, Nickerson DA, et al. Optimal unified  
919 approach for rare-variant association testing with application to small-sample case-control whole-  
920 exome sequencing studies. *Am J Hum Genet*. 2012;91(2):224-37.
- 921 42. Hernandez RD, Uricchio LH, Hartman K, Ye C, Dahl A, Zaitlen N. Ultrarare variants drive  
922 substantial cis heritability of human gene expression. *Nat Genet*. 2019;51(9):1349-55.
- 923 43. Li X, Kim Y, Tsang EK, Davis JR, Damani FN, Chiang C, et al. The impact of rare variation on  
924 gene expression across tissues. *Nature*. 2017;550(7675):239-43.
- 925 44. Barnett IJ, Lee S, Lin X. Detecting rare variant effects using extreme phenotype sampling in  
926 sequencing association studies. *Genet Epidemiol*. 2013;37(2):142-51.
- 927 45. Bjornland T, Bye A, Ryeng E, Wisloff U, Langaas M. Powerful extreme phenotype sampling  
928 designs and score tests for genetic association studies. *Stat Med*. 2018;37(28):4234-51.
- 929 46. Gorkin DU, Qiu Y, Hu M, Fletez-Brant K, Liu T, Schmitt AD, et al. Common DNA sequence  
930 variation influences 3-dimensional conformation of the human genome. *Genome Biol*. 2019;20(1):255.
- 931 47. Quinn JP, Savage AL, Bubb VJ. Non-coding genetic variation shaping mental health. *Curr*  
932 *Opin Psychol*. 2019;27:18-24.

- 933 48. Li Y, Oosting M, Deelen P, Ricano-Ponce I, Smeekens S, Jaeger M, et al. Inter-individual  
934 variability and genetic influences on cytokine responses to bacteria and fungi. *Nat Med.*  
935 2016;22(8):952-60.
- 936 49. Vösa U, Claringbould A, Westra H-J, Bonder MJ, Deelen P, Zeng B, et al. Unraveling the  
937 polygenic architecture of complex traits using blood eQTL metaanalysis. *bioRxiv.* 2018:447367.
- 938 50. Burgess S, Thompson SG. Use of allele scores as instrumental variables for Mendelian  
939 randomization. *Int J Epidemiol.* 2013;42(4):1134-44.
- 940 51. Rao SS, Huntley MH, Durand NC, Stamenova EK, Bochkov ID, Robinson JT, et al. A 3D map  
941 of the human genome at kilobase resolution reveals principles of chromatin looping. *Cell.*  
942 2014;159(7):1665-80.
- 943 52. Meddens CA, van der List ACJ, Nieuwenhuis EES, Mokry M. Non-coding DNA in IBD: from  
944 sequence variation in DNA regulatory elements to novel therapeutic potential. *Gut.* 2019;68(5):928-  
945 41.
- 946 53. Ramsuran V, Ewy R, Nguyen H, Kulkarni S. Variation in the Untranslated Genome and  
947 Susceptibility to Infections. *Front Immunol.* 2018;9:2046.
- 948 54. Zhang Q, Chao TC, Patil VS, Qin Y, Tiwari SK, Chiou J, et al. The long noncoding RNA  
949 ROCK1 regulates inflammatory gene expression. *EMBO J.* 2019;38(8).
- 950 55. Blecher-Gonen R, Amit I. M(odu)LLating the innate response. *Immunity.* 2012;36(4):551-2.
- 951 56. Austenaa L, Barozzi I, Chronowska A, Termanini A, Ostuni R, Prosperini E, et al. The histone  
952 methyltransferase Wbp7 controls macrophage function through GPI glycolipid anchor synthesis.  
953 *Immunity.* 2012;36(4):572-85.
- 954 57. Lees CW, Barrett JC, Parkes M, Satsangi J. New IBD genetics: common pathways with other  
955 diseases. *Gut.* 2011;60(12):1739-53.
- 956 58. Tcheandjieu C, Aguirre M, Saha P, Potiny P, Haendel M, Ingelsson E, et al. A phenome-wide  
957 association study of four syndromic genes reveals pleiotropic effects of common and rare variants in  
958 the general population. *medRxiv.* 2019:19010736.
- 959 59. Kim-Hellmuth S, Bechheim M, Putz B, Mohammadi P, Nedelec Y, Giangreco N, et al. Genetic  
960 regulatory effects modified by immune activation contribute to autoimmune disease associations. *Nat*  
961 *Commun.* 2017;8(1):266.

- 962 60. Tarazona-Santos E, Machado M, Magalhaes WC, Chen R, Lyon F, Burdett L, et al.  
963 Evolutionary dynamics of the human NADPH oxidase genes CYBB, CYBA, NCF2, and NCF4:  
964 functional implications. *Mol Biol Evol.* 2013;30(9):2157-67.
- 965 61. Jacob CO, Eisenstein M, Dinauer MC, Ming W, Liu Q, John S, et al. Lupus-associated causal  
966 mutation in neutrophil cytosolic factor 2 (NCF2) brings unique insights to the structure and function of  
967 NADPH oxidase. *Proc Natl Acad Sci U S A.* 2012;109(2):E59-67.
- 968 62. Rioux JD, Xavier RJ, Taylor KD, Silverberg MS, Goyette P, Huett A, et al. Genome-wide  
969 association study identifies new susceptibility loci for Crohn disease and implicates autophagy in  
970 disease pathogenesis. *Nat Genet.* 2007;39(5):596-604.
- 971 63. de Luca A, Smeekens SP, Casagrande A, Iannitti R, Conway KL, Gresnigt MS, et al. IL-1  
972 receptor blockade restores autophagy and reduces inflammation in chronic granulomatous disease in  
973 mice and in humans. *Proc Natl Acad Sci U S A.* 2014;111(9):3526-31.
- 974 64. Winter S, Hultqvist Hopkins M, Laulund F, Holmdahl R. A Reduction in Intracellular Reactive  
975 Oxygen Species Due to a Mutation in NCF4 Promotes Autoimmune Arthritis in Mice. *Antioxid Redox*  
976 *Signal.* 2016;25(18):983-96.
- 977 65. Cavalli G, Cenci S. Autophagy and Protein Secretion. *J Mol Biol.* 2020.
- 978 66. Sun J, Zheng Y, Hsu L. A unified mixed-effects model for rare-variant association in  
979 sequencing studies. *Genet Epidemiol.* 2013;37(4):334-44.
- 980 67. Smeekens SP, Ng A, Kumar V, Johnson MD, Plantinga TS, van Diemen C, et al. Functional  
981 genomics identifies type I interferon pathway as central for host defense against *Candida albicans*.  
982 *Nat Commun.* 2013;4:1342.
- 983 68. Winter DR, Jung S, Amit I. Making the case for chromatin profiling: a new tool to investigate  
984 the immune-regulatory landscape. *Nat Rev Immunol.* 2015;15(9):585-94.
- 985 69. Wainschtein P, Jain DP, Yengo L, Zheng Z, Cupples LA, Shadyab AH, et al. Recovery of trait  
986 heritability from whole genome sequence data. *bioRxiv.* 2019:588020.
- 987 70. de Magalhaes JP, Wang J. The fog of genetics: what is known, unknown and unknowable in  
988 the genetics of complex traits and diseases. *EMBO Rep.* 2019;20(11):e48054.
- 989 71. Kluck V, van Deuren RC, Cavalli G, Shaukat A, Arts P, Cleophas MC, et al. Rare genetic  
990 variants in interleukin-37 link this anti-inflammatory cytokine to the pathogenesis and treatment of  
991 gout. *Ann Rheum Dis.* 2020;79(4):536-44.

992 72. Novick D, Kim SH, Fantuzzi G, Reznikov LL, Dinarello CA, Rubinstein M. Interleukin-18  
993 binding protein: a novel modulator of the Th1 cytokine response. *Immunity*. 1999;10(1):127-36.  
994



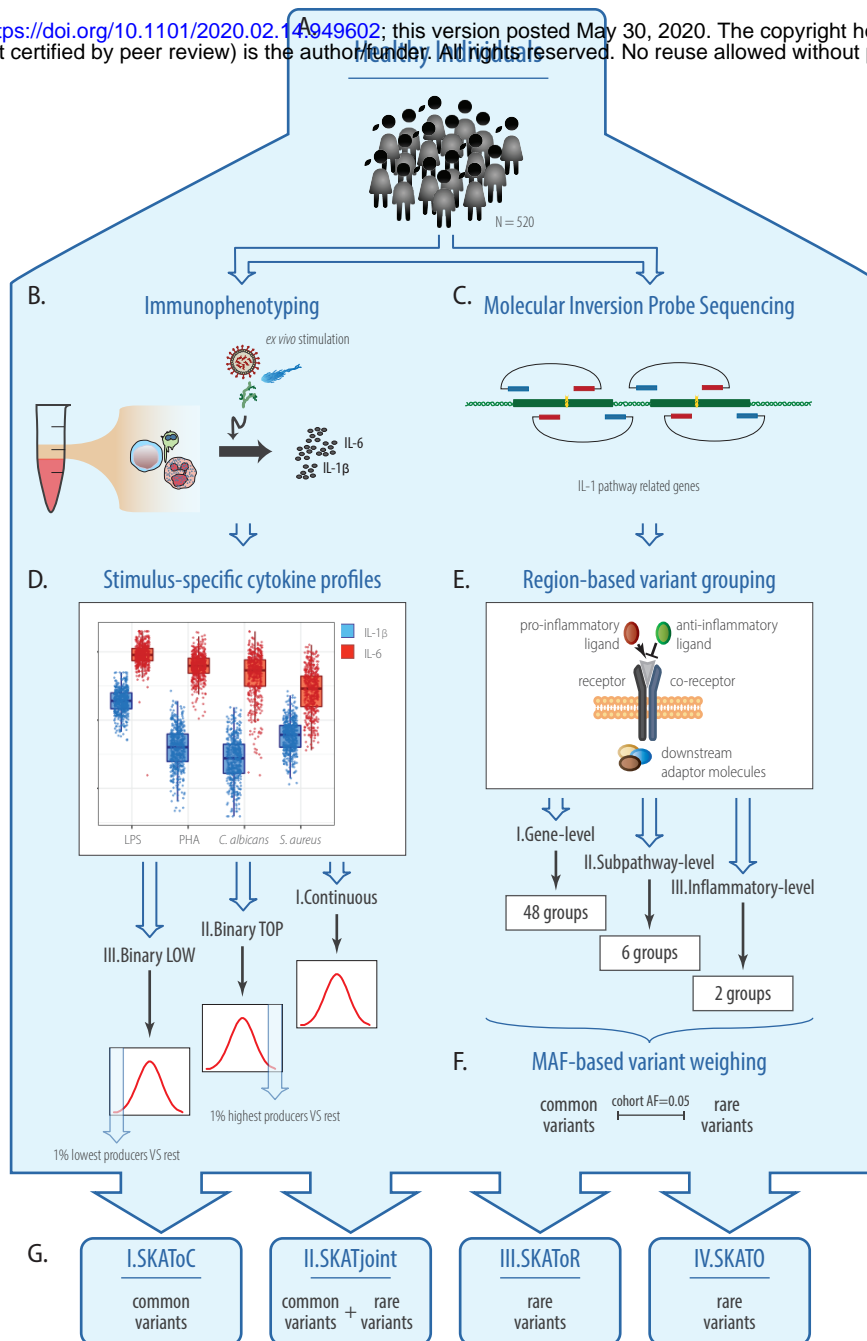

A. IL-1 $\beta$

bioRxiv preprint doi: <https://doi.org/10.1101/2020.02.14.949602>; this version posted May 30, 2020. The copyright holder for this preprint (which was not certified by peer review) is the author/funder. All rights reserved. No reuse allowed without permission.

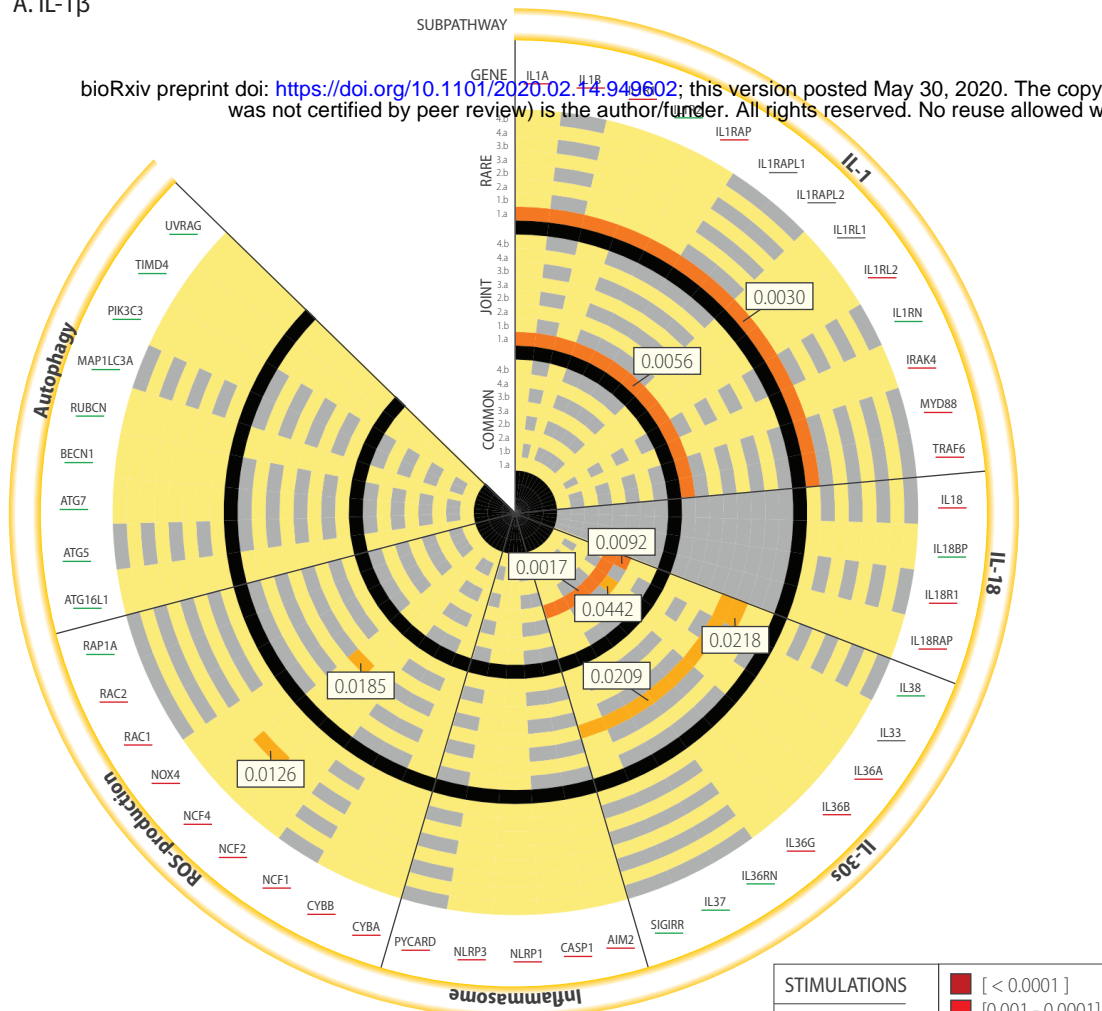

B. IL-6

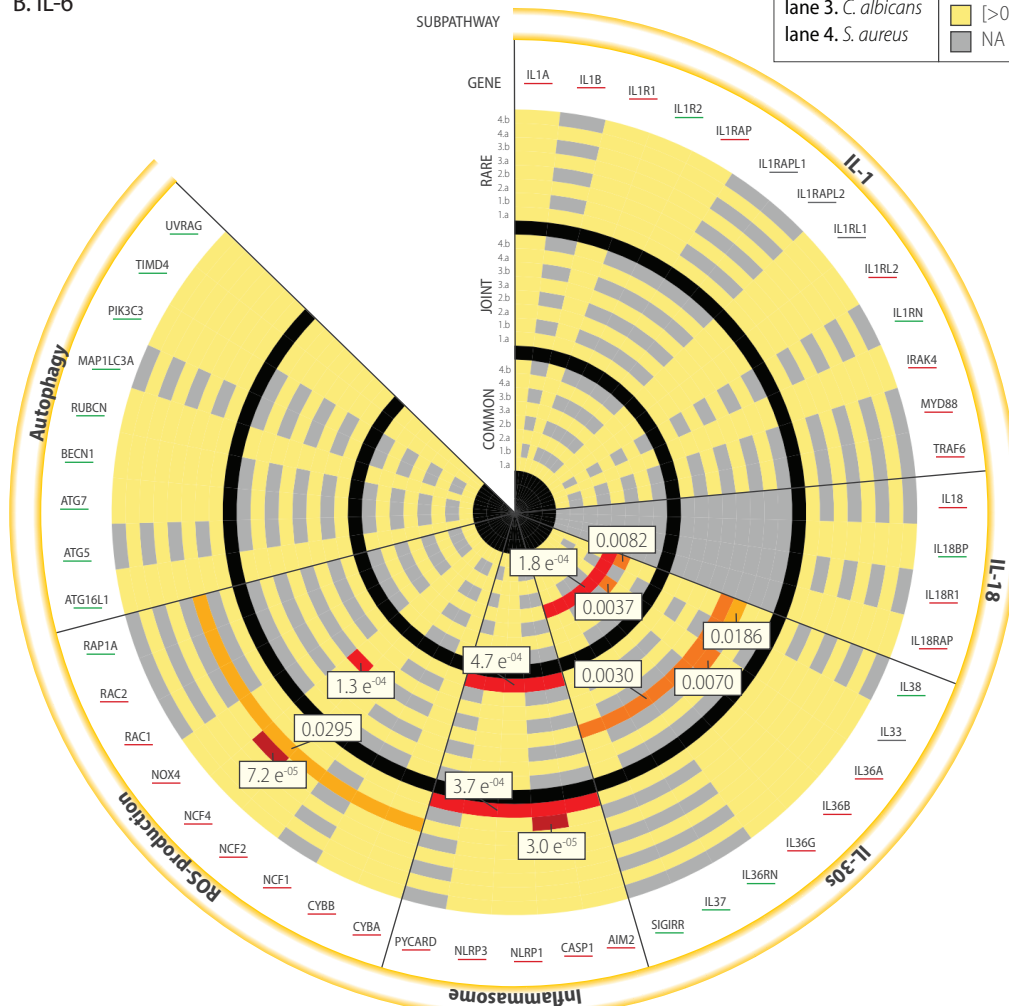

A. IL-1 $\beta$

B. IL-6

C. *S. aureus* stimulated IL-6

bioRxiv preprint doi: <https://doi.org/10.1101/2020.02.14.949602>; this version posted May 30, 2020. The copyright holder for this preprint (which was not certified by peer review) is the author/funder. All rights reserved. No reuse allowed without permission.

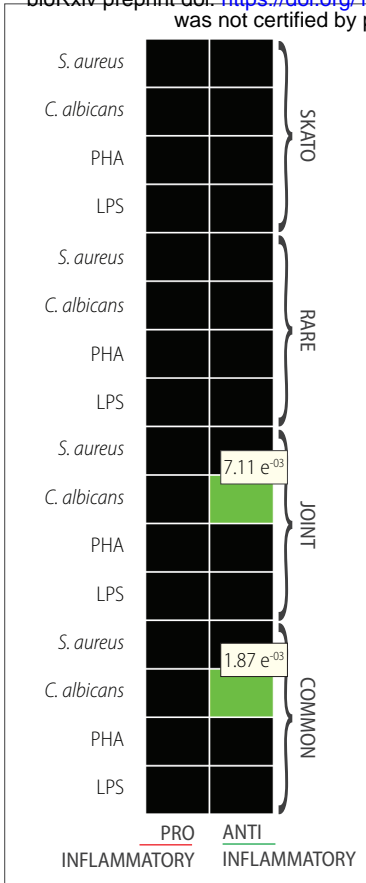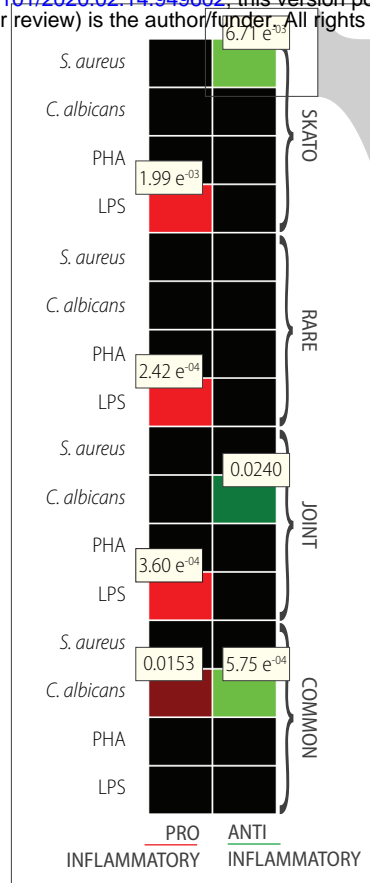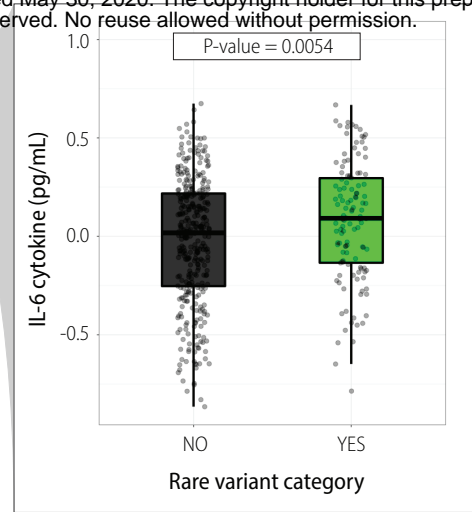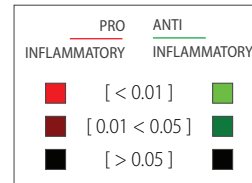

A. IL-1 $\beta$

B. IL-6

bioRxiv preprint doi: <https://doi.org/10.1101/2020.02.14.949602>; this version posted May 30, 2020. The copyright holder for this preprint (which was not certified by peer review) is the author/funder. All rights reserved. No reuse allowed without permission.

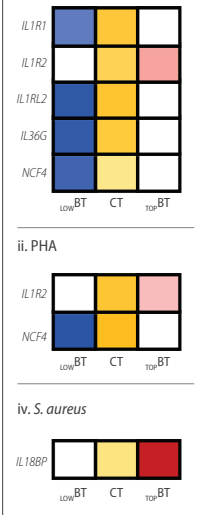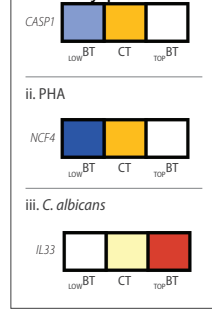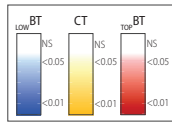

A. Coding *IL36A* and *IL38* common variant genotypes with IL-1 $\beta$  and IL-6

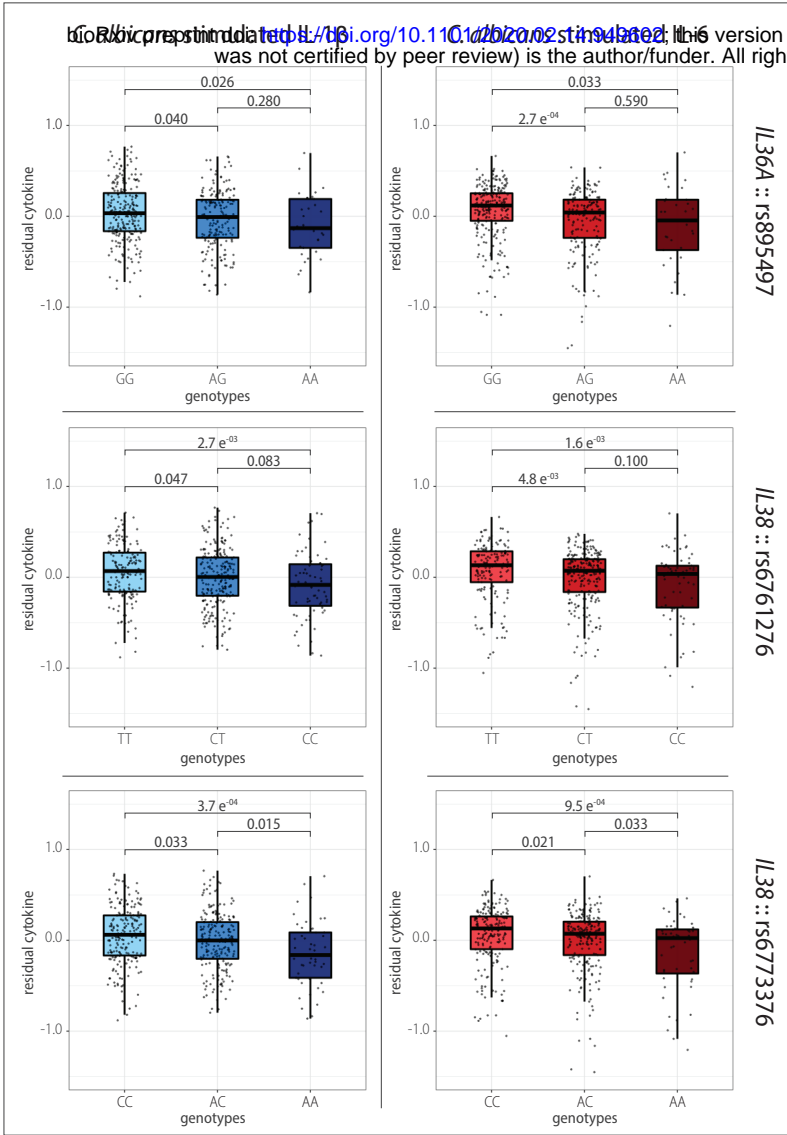

B. Non-coding and coding common variant sets with IL-1 $\beta$  and IL6

|                        | <i>IL36A</i> | <i>IL38</i> | IL-30s | Pro-inflammatory | Anti-inflammatory |
|------------------------|--------------|-------------|--------|------------------|-------------------|
| SNPs (n)               | 17           | 41          | 283    | 1436             | 994               |
| IL-1 $\beta$ (P-value) | 0.248        | 0.046*      | 0.337  | na               | 0.222             |
| IL-6 (P-value)         | 0.049*       | 0.007**     | 0.427  | 0.019*           | 0.280             |

C. Allelic score of significant (non-)coding common variant sets

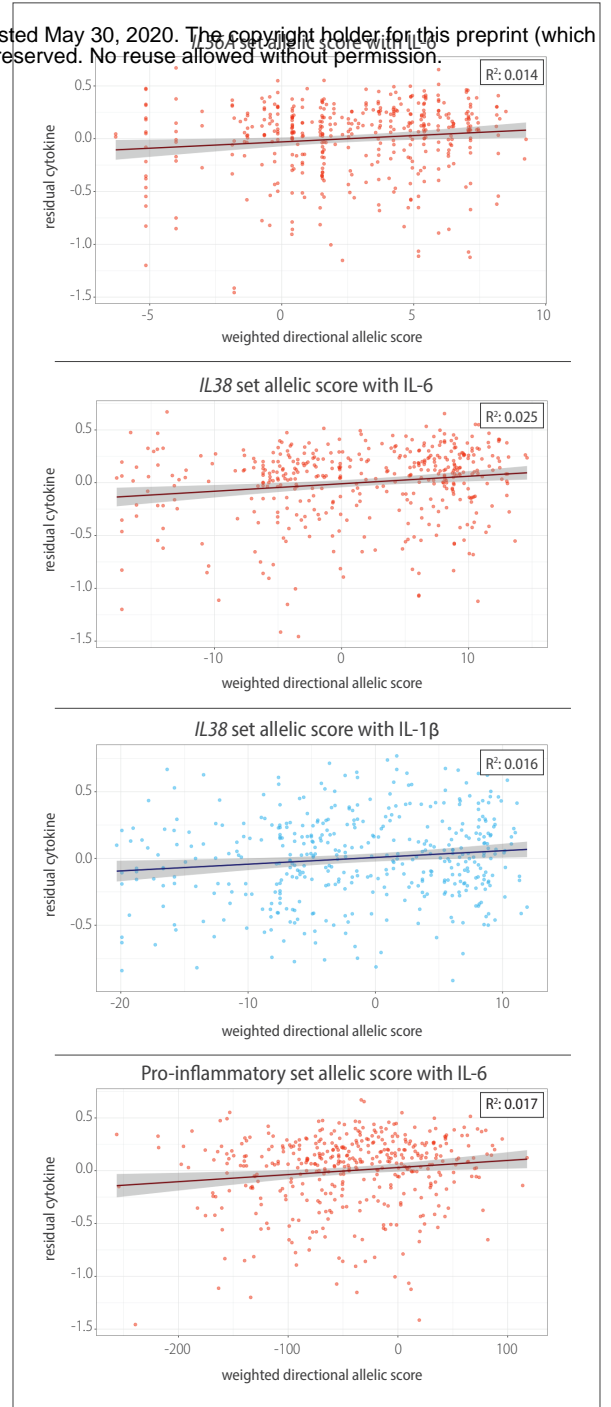

bioRxiv preprint doi: <https://doi.org/10.1101/2020.05.30.162002>; this version posted May 30, 2020. The copyright holder for this preprint (which was not certified by peer review) is the author/funder. All rights reserved. No reuse allowed without permission.
